# Supplementary material for: Feature-based detection of automated language models: tackling GPT-2, GPT-3 and Grover
Source: PeerJ journal article supplement (doi:10.7717/peerj-cs.443), 2021-04-06
Supplement: Features.pdf [file Features.pdf]

## Features

This document provides additional examples and explanations for selected features as well as a comprehensive overview of all features that have been used for classification, categorized by the different feature-sets and referenced to the type of artifact produced by language models they are expected to exploit.

**Conjunction Overlap** captures repetitions of Uni-, Bi- and Tri-grams around *and*-conjunctions; *the text and the text*

**Coreference Chains** (or clusters) are based on the repeated reference towards an entity throughout the text. References can be made in a number of ways, the most common include the use of the entity's name, a descriptive noun (phrase) or pronouns. The span of a coreference chain is the difference in index-position of the first and last reference towards the coreference chain's entity in a text; *Emma writes a book. She aspires to become a famous author.* In this example, a coreference chain concerned with the entity referred to as Emma can be found. The two references made to that entity are unique, and the first is a *named entity* reference. The span of this coreference chain is 4, as the first reference sits on index-position 0 and the second reference sits on index-position 4.

**Empath Features** are simple, word-count based features. Given a number of words defining a category, e.g. *blue - green - red - yellow* for the category *colors*, the number of occurrences of words from that category in a text are summed up to yield that category's empath score; *The red ball was thrown into the blue sea* would thus have an empath score of 2 in the *colors*-category.

**Entity-Grid Features** build on the relative frequencies of entity transitions through a text. In addition to just tracking their appearance, entity transitions also consider the entities' grammatical role; *Tom likes to tell jokes. He is considered to be funny.* Since the entity referred to as Tom appears as a subject in the first sentence and reappears as an object in the consecutive sentence, an entity transition from subject [S] to object [O] would be registered here.

| Index                                              | Feature                                               |
|----------------------------------------------------|-------------------------------------------------------|
| <i>basic features (absolute)</i> (Other Features)  |                                                       |
| 0                                                  | Number of characters                                  |
| 1                                                  | Number of syllables                                   |
| 2                                                  | Number of words                                       |
| 3                                                  | Number of sentences                                   |
| 4                                                  | Number of difficult words                             |
| 5                                                  | Number of short words                                 |
| 6                                                  | Number of long words                                  |
| <i>basic features (relative)</i> (Other Features)  |                                                       |
| 7                                                  | Characters per Word                                   |
| 8                                                  | Syllables per Word                                    |
| 9                                                  | Words per Sentence                                    |
| 10                                                 | Share difficult words in total words                  |
| 11                                                 | Share short words in total words                      |
| 12                                                 | Share long words in total words                       |
| <i>readability features</i> (Other Features)       |                                                       |
| 13                                                 | Automatic Readability Index                           |
| 14                                                 | Coleman Liau Index                                    |
| 15                                                 | Flesch-Kincaid Grade Level                            |
| 16                                                 | Flesch-Kincaid Reading Ease                           |
| 17                                                 | Gunning-Fog Index                                     |
| 18                                                 | LIX                                                   |
| 19                                                 | McAlpine EFLAW Score                                  |
| 20                                                 | RIX                                                   |
| 21                                                 | SMOG Grade                                            |
| <i>lexical diversity features</i> (Repetitiveness) |                                                       |
| 22                                                 | Share stop-words in total words                       |
| 23                                                 | Share unique words in total words                     |
| 24                                                 | Share words in google top-100 list in total words     |
| 25                                                 | Share words in google top-1000 list in total words    |
| 26                                                 | Share words in google top-10000 list in total words   |
| <i>formatting features</i> (Other Features)        |                                                       |
| 27 - 39                                            | Rel. frequencies of punctuation marks [,:;?!-”()[]\n] |
| 40 - 52                                            | Punctuation marks per sentence                        |
| 53                                                 | Number of paragraphs                                  |
| 54                                                 | Average paragraph length                              |

Table 1: Feature Overview I

| Index                                                                  | Feature                                                                                                                                                             |
|------------------------------------------------------------------------|---------------------------------------------------------------------------------------------------------------------------------------------------------------------|
| <i>lexical and syntactic repetitiveness features</i> (Repetitiveness)  |                                                                                                                                                                     |
| 55 - 64                                                                | Unigram overlap of words between consecutive sentences (10 uniform bins from 0 to 1)                                                                                |
| 65 - 74                                                                | Bigram overlap of words between consecutive sentences (10 uniform bins from 0 to 1)                                                                                 |
| 75 - 84                                                                | Trigram overlap of words between consecutive sentences (10 uniform bins from 0 to 1)                                                                                |
| 85 - 94                                                                | Unigram overlap of POS-tags between consecutive sentences (10 uniform bins from 0 to 1)                                                                             |
| 95 - 104                                                               | Bigram overlap of POS-tags between consecutive sentences (10 uniform bins from 0 to 1)                                                                              |
| 105 - 114                                                              | Trigram overlap of POS-tags between consecutive sentences (10 uniform bins from 0 to 1)                                                                             |
| 115 - 117                                                              | Uni-, Bi- and Trigram overlap of words around <i>and</i> -conjunctions                                                                                              |
| <i>syntactic features</i> (Lack of Syntactic and Lexical Diversity)    |                                                                                                                                                                     |
| 118 - 136                                                              | Rel. frequencies of POS-tags [ADJ, ADP, ADV, NOUN, VERB, AUX, CONJ, CCONJ, DET, INTJ, NUM, PART, PRON, PROPN, PUNCT, SCONJ, SYM, X, SPACE]                          |
| 137 - 155                                                              | POS-tags per sentence                                                                                                                                               |
| 156 - 160                                                              | [ADJ,ADP,ADV,NOUN,VERB]-tags in total words                                                                                                                         |
| 161 - 165                                                              | Unique [ADJ,ADP,ADV,NOUN,VERB]-tags in total words                                                                                                                  |
| 166 - 170                                                              | [ADJ,ADP,ADV,NOUN,VERB]-tags in total [ADJ,ADP,ADV,NOUN,VERB]-tags                                                                                                  |
| 171 - 175                                                              | Unique [ADJ,ADP,ADV,NOUN,VERB]-tags in total unique [ADJ,ADP,ADV,NOUN,VERB]-tags                                                                                    |
| 176 - 180                                                              | [ADJ,ADP,ADV,NOUN,VERB]-tags per sentence                                                                                                                           |
| 181 - 185                                                              | Unique [ADJ,ADP,ADV,NOUN,VERB]-tags per sentence                                                                                                                    |
| <i>named-entity features</i> (Lack of Syntactic and Lexical Diversity) |                                                                                                                                                                     |
| 186 - 203                                                              | Rel. frequencies of NE-tags [PERSON, NORP, FAC, ORG, GPE, LOC, PRODUCT, EVENT, WORK-OF-ART, LAW, LANGUAGE, DATE, TIME, PERCENT, MONEY, QUANTITY, ORDINAL, CARDINAL] |
| 204 - 221                                                              | NE-tags per sentence                                                                                                                                                |
| 222                                                                    | Share unique NE-tags in total NE-tags                                                                                                                               |
| 223                                                                    | NE-tags in total words                                                                                                                                              |
| 224                                                                    | Unique NE-tags in total words                                                                                                                                       |
| 225                                                                    | NE-tags in total sentences                                                                                                                                          |
| 226                                                                    | Unique NE-tags in total sentences                                                                                                                                   |
| <i>coreference features</i> (Lack of Syntactic and Lexical Diversity)  |                                                                                                                                                                     |
| 227 - 236                                                              | Share of unique coreferences in total coreferences per cluster (10 uniform bins from 0 to 1)                                                                        |
| 237                                                                    | Coreferences per cluster                                                                                                                                            |
| 238                                                                    | Average span of clusters                                                                                                                                            |
| 239                                                                    | Share of long coreference chains (span > document length / 2)                                                                                                       |
| 240                                                                    | Share of short inferences (distance between first and second coreference $\leq 20$ )                                                                                |
| 241                                                                    | Share of shorter inferences (distance between first and second coreference $\leq 10$ )                                                                              |
| 242                                                                    | Share of shortest inferences (distance between first and second coreference $\leq 5$ )                                                                              |
| 243                                                                    | Share of NEs in total references                                                                                                                                    |
| 244                                                                    | Active coreference chains per word                                                                                                                                  |
| 245                                                                    | Active coreference chains per NE-tag                                                                                                                                |

Table 2: Feature Overview II

| Index                                                | Feature                                                                                                |
|------------------------------------------------------|--------------------------------------------------------------------------------------------------------|
| <i>entity-grid features</i> (Lack of Coherence)      |                                                                                                        |
| 246 - 261                                            | Rel. frequencies of entity transitions [SS, SO, SX, S-, OS, OO, OX, O-, XS, XS, XX, X-, -S, -X, -O, -] |
| <i>topic redundancy features</i> (Lack of Coherence) |                                                                                                        |
| 262                                                  | Information Loss                                                                                       |
| 263 - 266                                            | Mean, Median, Maximum and Minimum of truncated Matrix                                                  |
| 267 - 270                                            | Difference in Mean, Median, Maximum and Minimum between original and truncated Matrix                  |
| 271                                                  | Information Loss (lemmatized)                                                                          |
| 272 - 275                                            | Mean, Median, Maximum and Minimum of truncated Matrix (lemmatized)                                     |
| 276 - 279                                            | Difference in Mean, Median, Maximum and Minimum between original and truncated Matrix (lemmatized)     |
| <i>empath features</i> (Lack of Purpose)             |                                                                                                        |
| 280                                                  | Share of topical words in total words                                                                  |
| 281 - 285                                            | Mean, Median, Minimum, Maximum and Variance of empath scores                                           |
| 286                                                  | Number of active categories (empath score > 0)                                                         |
| 287 - 291                                            | Mean, Median, Minimum, Maximum and Variance of active categories                                       |
| 292 - 296                                            | Empath scores of [spatial,sentiment,opinion,logic,ethic] categories                                    |
| <i>yule's Q features</i> (Lack of Coherence)         |                                                                                                        |
| 297                                                  | Q-Score based on human corpus                                                                          |
| 298                                                  | Q-Score based on machine corpus                                                                        |
| 299                                                  | Share of word-pairs not in human corpus                                                                |
| 300                                                  | Share of word-pairs not in machine corpus                                                              |

Table 3: Feature Overview III
