# Supplementary material for: Feature-based detection of automated language models: tackling GPT-2, GPT-3 and Grover
Source: PubMed Central journal article supplement (PMC8049133; doi:10.7717/peerj-cs.443), 2021-04-06
Supplement: peerj-cs-07-443-s004.pdf [file peerj-cs-07-443-s004.pdf]

## Optimization

The first table documents the parameter grid underlying the grid-search to find the best individually optimized classifier across a range of parameter constellations. The resulting optimal parameter constellations for the different classifiers are documented in the subsequent tables.

| Parameter     | Values                  |
|---------------|-------------------------|
| Layers        | (100), (25,50,25)       |
| Activation    | ReLU, Logistic          |
| Learning Rate | 0.001, 0.01             |
| Alpha         | 0.00005, 0.0001, 0.0005 |

Table 1: Grid-Search Parameters.

| Classifier | Parameters   |            |               |        |
|------------|--------------|------------|---------------|--------|
|            | Layers       | Activation | Learning Rate | Alpha  |
| s          | (25, 50, 25) | ReLU       | 0.01          | 0.0005 |
| xl         | (100)        | ReLU       | 0.01          | 0.0005 |
| s-k        | (100)        | ReLU       | 0.001         | 0.0005 |
| xl-k       | (25, 50, 25) | ReLU       | 0.01          | 0.0005 |
| GPT3       | (100)        | Logistic   | 0.001         | 0.0005 |
| Grover     | (25, 50, 25) | ReLU       | 0.01          | 0.0001 |

Table 2: Single-Dataset Classifiers, Optimal Parameter Constellations.

| Classifier | Parameters   |            |               |         |
|------------|--------------|------------|---------------|---------|
|            | Layers       | Activation | Learning Rate | Alpha   |
| s          | (100)        | Logistic   | 0.001         | 0.0005  |
| xl         | (25, 50, 25) | ReLU       | 0.001         | 0.00005 |
| s-k        | (25, 50, 25) | ReLU       | 0.001         | 0.0005  |
| xl-k       | (25, 50, 25) | ReLU       | 0.001         | 0.00005 |
| GPT3       | (25, 50, 25) | Logistic   | 0.001         | 0.0001  |
| Grover     | (100)        | ReLU       | 0.01          | 0.00005 |

Table 3: Single-Dataset Classifiers, no Q, Optimal Parameter Constellations.

| Classifier | Parameters   |            |               |         |
|------------|--------------|------------|---------------|---------|
|            | Layers       | Activation | Learning Rate | Alpha   |
| s          | (25, 50, 25) | ReLU       | 0.001         | 0.0005  |
| xl         | (100)        | ReLU       | 0.01          | 0.0005  |
| s-k        | (100)        | ReLU       | 0.001         | 0.0005  |
| xl-k       | (100)        | ReLU       | 0.01          | 0.00005 |
| GPT3       | (100)        | ReLU       | 0.01          | 0.00005 |
| Grover     | (100)        | Logistic   | 0.091         | 0.0001  |

Table 4: Single-Dataset Classifiers, Filtered, Optimal Parameter Constellations.

| Classifier | Parameters   |            |               |        |
|------------|--------------|------------|---------------|--------|
|            | Layers       | Activation | Learning Rate | Alpha  |
| GPT2-un    | (25, 50, 25) | ReLU       | 0.01          | 0.0005 |
| GPT2-k     | (100)        | ReLU       | 0.01          | 0.0005 |
| GPT2       | (25, 50, 25) | ReLU       | 0.01          | 0.0005 |
| All        | (100)        | ReLU       | 0.01          | 0.0001 |

Table 5: Multi-Dataset Classifiers, Optimal Parameter Constellations.

| Classifier | Parameters   |            |               |         |
|------------|--------------|------------|---------------|---------|
|            | Layers       | Activation | Learning Rate | Alpha   |
| GPT2-un    | (25, 50, 25) | ReLU       | 0.001         | 0.0001  |
| GPT-k      | (25, 50, 25) | ReLU       | 0.001         | 0.0001  |
| GPT2       | (25, 50, 25) | ReLU       | 0.001         | 0.00005 |
| All        | (25, 50, 25) | ReLU       | 0.001         | 0.00005 |

Table 6: Multi-Dataset Classifiers, no Q, Optimal Parameter Constellations.

| Feature-Set    | Classifier |         |         |         |         |         |
|----------------|------------|---------|---------|---------|---------|---------|
|                | s          | xl      | s-k     | xl-k    | GPT3    | Grover  |
| basicAbs       | 0.001      | 0.001   | 0.001   | 0.001   | 0.001   | 0.001   |
|                | 0.0001     | 0.00005 | 0.0001  | 0.00005 | 0.0001  | 0.0001  |
| basicRel       | 0.001      | 0.0001  | 0.001   | 0.001   | 0.001   | 0.001   |
|                | 0.00005    | 0.0001  | 0.0001  | 0.00005 | 0.00005 | 0.0001  |
| readability    | 0.001      | 0.001   | 0.001   | 0.001   | 0.001   | 0.0001  |
|                | 0.0001     | 0.00005 | 0.00005 | 0.00005 | 0.0001  | 0.0001  |
| lexicalDiv     | 0.001      | 0.001   | 0.001   | 0.001   | 0.0001  | 0.001   |
|                | 0.00005    | 0.0001  | 0.00005 | 0.00005 | 0.00005 | 0.0001  |
| formatting     | 0.001      | 0.001   | 0.001   | 0.001   | 0.001   | 0.001   |
|                | 0.00005    | 0.00005 | 0.00005 | 0.0001  | 0.00005 | 0.00005 |
| repetitiveness | 0.001      | 0.001   | 0.001   | 0.001   | 0.0001  | 0.001   |
|                | 0.00005    | 0.0001  | 0.00005 | 0.00005 | 0.00005 | 0.00005 |
| syntactic      | 0.001      | 0.001   | 0.001   | 0.001   | 0.001   | 0.001   |
|                | 0.0001     | 0.00005 | 0.00005 | 0.00005 | 0.00005 | 0.0001  |
| NE             | 0.001      | 0.001   | 0.001   | 0.0001  | 0.001   | 0.001   |
|                | 0.0001     | 0.0001  | 0.0001  | 0.00005 | 0.0001  | 0.00005 |
| coreference    | 0.001      | 0.001   | 0.001   | 0.0001  | 0.001   | 0.001   |
|                | 0.00005    | 0.0001  | 0.0001  | 0.00005 | 0.00005 | 0.0001  |
| entityGrid     | 0.001      | 0.001   | 0.001   | 0.0001  | 0.0001  | 0.001   |
|                | 0.00005    | 0.0001  | 0.0001  | 0.0001  | 0.00005 | 0.00005 |
| infoLoss       | 0.001      | 0.001   | 0.001   | 0.001   | 0.001   | 0.001   |
|                | 0.0001     | 0.00005 | 0.0001  | 0.00005 | 0.00005 | 0.00005 |
| empath         | 0.001      | 0.001   | 0.001   | 0.0001  | 0.001   | 0.001   |
|                | 0.0001     | 0.0001  | 0.00005 | 0.00005 | 0.0001  | 0.0001  |
| Q              | 0.0001     | 0.001   | 0.0001  | 0.0001  | 0.001   | 0.0001  |
|                | 0.00005    | 0.00005 | 0.00005 | 0.00005 | 0.00005 | 0.00005 |

Table 7: Feature-Set Classifiers, Optimal Parameter Constellations. The feature-set classifiers have been optimised only on the initial learning rate (Values: [0.0001, 0.001]) and the alpha parameter (Values: [0.00005, 0.00001]), with the activation being fixed to *ReLU* and the layers to  $(25, 50, 25)$ . For every set of features, the first row shows the optimal initial learning rate, and the second row the optimal alpha parameter.

| Classifier      | LR<br>C | NN<br>ActivationLayers | Learning<br>Rate | Alpha   |
|-----------------|---------|------------------------|------------------|---------|
| <b>Separate</b> |         |                        |                  |         |
| s               | 1/64    | Logistic (5, 10, 5)    | 0.00001          | 0.00001 |
| xl              | 1/64    | Logistic (5, 10, 5)    | 0.00001          | 0.00001 |
| s-k             | 32      | Logistic (5, 10, 5)    | 0.0001           | 0.00001 |
| xl-k            | 64      | ReLU (100)             | 0.00001          | 0.00001 |
| GPT3            | 1       | Logistic (25, 50, 25)  | 0.001            | 0.00001 |
| Grover          | 64      | Logistic (100)         | 0.001            | 0.00001 |
| <b>Super</b>    |         |                        |                  |         |
| s               | 1/64    | ReLU (100)             | 0.0001           | 0.00001 |
| xl              | 1/8     | Logistic (25, 50, 25)  | 0.001            | 0.00001 |
| s-k             | 4       | ReLU (5, 10, 5)        | 0.0001           | 0.005   |
| xl-k            | 1/64    | Logistic (100)         | 0.001            | 0.005   |
| GPT3            | 1/8     | Logistic (25, 50, 25)  | 0.001            | 0.00001 |
| Grover          | 0.25    | Logistic (5, 10, 5)    | 0.001            | 0.00001 |

Table 8: Ensemble-Classifier, Optimal Parameter Constellations. The NN ensemble-classifiers have been optimised on the type of activation (Values: [ReLU, Logistic]), the hidden layer sizes (Values: [(100), (25,50,25), (5, 10, 5)]), the initial learning rate (Values: [0.00001, 0.0001, 0.001] and alpha (Values: [0.00001, 0.00005, 0.0001, 0.0005]). The LR ensemble-classifiers have been optimised on the regulation parameter C. Values: [1/64, 1/32, 1/16, 1/8, 1/4, 1/2, 1, 2, 4, 8, 16, 32, 64]
